# Supplementary material for: Un cuento ruso en Galicia sobre los ríos
Source: Royal Society of Chemistry journal article supplement (doi:10.1039/c4mb00478g), 2004-01-01
Supplement: c4mb00478g2.pdf [file c4mb00478g2.pdf]

### **Supplemental figure legends**

Figure S1. AUC scores for the positive sets with different sample sizes. The AUC scores were calculated based on ten-fold cross-validation.
