# Supplementary figures and images for: Un cuento ruso en Galicia sobre los ríos
Source: Royal Society of Chemistry journal article supplement (doi:10.1039/c4mb00478g), 2004-01-01

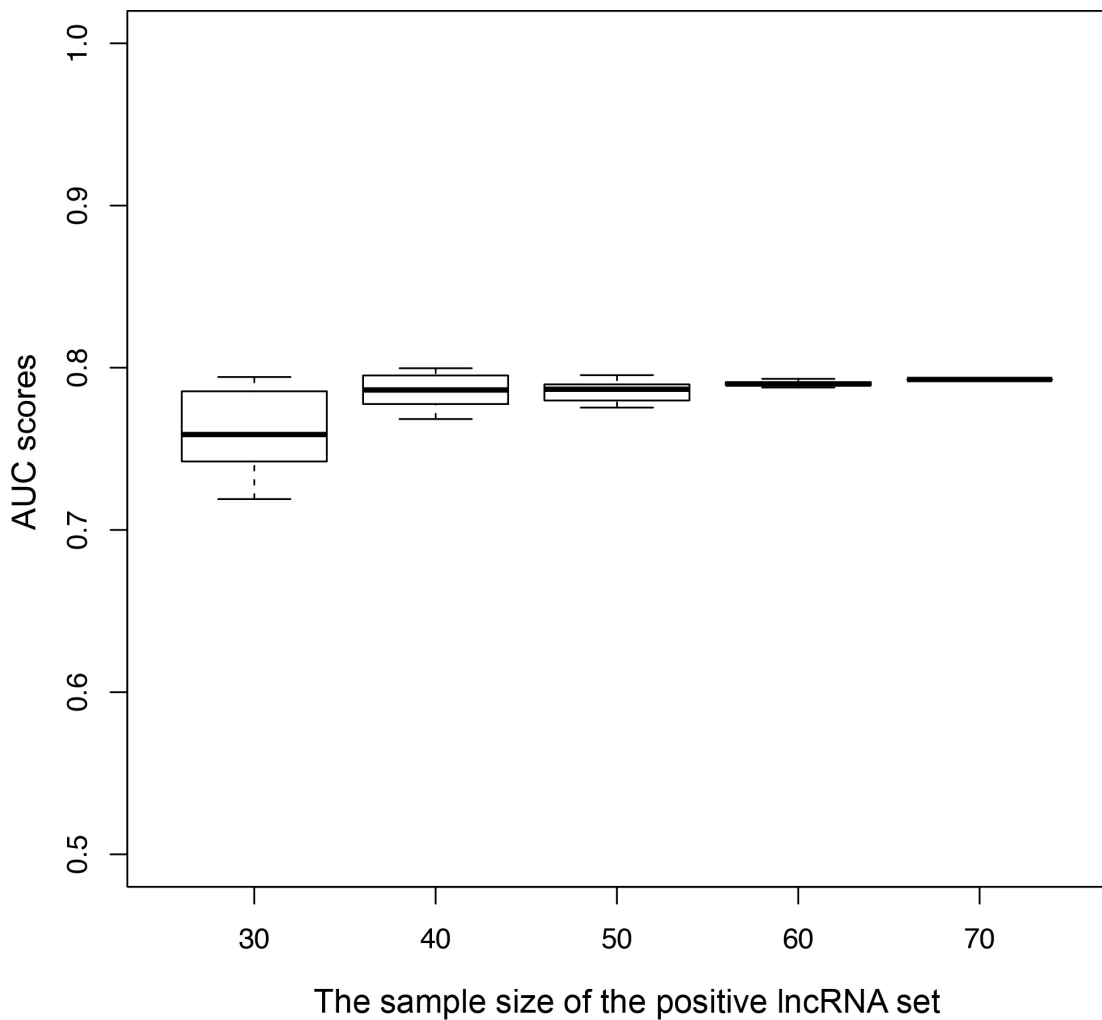

Supplement: c4mb00478g1.pdf [file c4mb00478g1.pdf]
